# Supplementary material for: Ovarian fluid allows directional cryptic female choice despite external fertilization
Source: PubMed Central journal article supplement (PMC4990696; doi:10.1038/ncomms12452), 2016-08-16
Supplement: ncomms12452-s1.pdf [file ncomms12452-s1.pdf]

## Supplementary Tables

### Supplementary Table 1

Characterization of the six [sic] *Symphodus ocellatus* microsatellite loci used in this study (based on five populations and 10 individuals per population, this information is based on a partial reprint of Table 1 from Arigoni & Largiadèr 2000<sup>1</sup> for the six loci used in this study).

| Locus       | Repeat Array                                               | Primer sequences (5' → 3')                                | Annealing temp (°C) | MgCl <sub>2</sub> (mM) | Number of alleles | Size range (bp)** | H <sub>O</sub>    | H <sub>E</sub>      |
|-------------|------------------------------------------------------------|-----------------------------------------------------------|---------------------|------------------------|-------------------|-------------------|-------------------|---------------------|
| Soc1017PBBE | (AC) <sub>20</sub> GC<br>(AC) <sub>2</sub>                 | *TCC TGT CAG TCT CCC TTC A<br>GTG ATT GAT TAG GCG ATG AG  | 63                  | 0.8                    | 20<br>(9-15)      | 77-123<br>(101)   | 0.86<br>(0.6-1.0) | 0.92<br>(0.87-0.96) |
| Soc1063PBBE | (GA) <sub>2</sub> (GT) <sub>8</sub><br>AT(GT) <sub>4</sub> | *CCC TTC TTG TGT CAT TCC AAG<br>CCT CAC TTG ATA TGT CC    | 56                  | 0.8                    | 14<br>(6-9)       | 92-134<br>(98)    | 0.76<br>(0.4-1.0) | 0.86<br>(0.83-0.91) |
| Soc1109PBBE | (GT) <sub>10</sub>                                         | *AGG ATT TAG CCT GCC CAG GA<br>TGC GGT GAA TGG CTG TAG GT | 57                  | 1.0                    | 13<br>(7-9)       | 133-167<br>(137)  | 0.84<br>(0.7-1.0) | 0.87<br>(0.80-0.89) |
| Soc1198PBBE | (TG) <sub>5</sub> TA<br>(TG) <sub>13</sub>                 | *CTC TTT CTG CCT GCA CTC GAC<br>TTC ATT GGA CAG CAC AC    | 57                  | 1.2                    | 11<br>(5-9)       | 89-113<br>(109)   | 0.76<br>(0.6-0.9) | 0.80<br>(0.67-0.89) |
| Soc3121PBBE | (GT) <sub>18</sub>                                         | *ACG ACA AGC TGC ACG AAC<br>CCA GTA ATT CTG ACT CCA CCC   | 56                  | 0.9                    | 28<br>(12-14)     | 82-205<br>(102)   | 0.90<br>(0.8-1.0) | 0.95<br>(0.94-0.96) |
| Soc3200PBBE | (GT) <sub>15</sub>                                         | *AGT GCC AGA TGT ATA TGG G<br>CAT GGA CGC ATT TGT AGC     | 51                  | 1.0                    | 27<br>(12-14)     | 120-188<br>(134)  | 0.88<br>(0.8-1.0) | 0.94<br>(0.91-0.96) |

The sequences of cloned fragments have GenBank accession nos AJ278566–AJ278572; H<sub>O</sub>, observed heterozygosity; H<sub>E</sub>, expected heterozygosity; given are the mean values across the five populations with range in parentheses. \*Primer used for end-labelling. \*\*Cloned insert size in parentheses.

### Supplementary References

1. Arigoni, S. & Largiadèr, C. R. Isolation and characterization of microsatellite loci from the ocellated wrasse *Symphodus ocellatus* (Perciformes: Labridae) and their applicability to related taxa. *Molecular Ecology* **9**, 2166-2169, (2000).
